# Supplementary material for: The effect of belief in a just world on psychological resilience in junior high school left-behind children: the role of gratitude and proactive personality
Source: Research Square preprint supplement (doi:10.21203/rs.3.rs-6975860/v1), 2025-10-31
Supplement: Supplementary file 1 [file fbabd39adc16c3e27e5c9cfe.docx]

| **Strongly disagree** | | | **Disagree** | **Slightly disagree** | **Slightly agree** | **Agree** | | **Strongly agree** | | | | | |
| --- | --- | --- | --- | --- | --- | --- | --- | --- | --- | --- | --- | --- | --- |
| **1** | | | **2** | **3** | **4** | **5** | | **6** | | | | | |
|  |  | **Belief in a Just World** | | | | | | | | | | | |
| **GBJW** | **1** | I believe that, by and large, I deserve what happens to me. | | | | | 1 | | 2 | 3 | 4 | 5 | 6 |
| **2** | I am usually treated fairly. | | | | | 1 | | 2 | 3 | 4 | 5 | 6 |
| **3** | I believe that I usually get what I deserve. | | | | | 1 | | 2 | 3 | 4 | 5 | 6 |
| **4** | Overall, events in my life are just. | | | | | 1 | | 2 | 3 | 4 | 5 | 6 |
| **5** | In my life injustice is the exception rather than the rule. | | | | | 1 | | 2 | 3 | 4 | 5 | 6 |
| **6** | I believe that most of the things that happen in my life are fair. | | | | | 1 | | 2 | 3 | 4 | 5 | 6 |
| **7** | I think that important decisions that are made concerning me are usually just. | | | | | 1 | | 2 | 3 | 4 | 5 | 6 |
| **PBJW** | **8** | I think basically the world is a just place. | | | | | 1 | | 2 | 3 | 4 | 5 | 6 |
| **9** | I believe that, by and large, people get what they deserve. | | | | | 1 | | 2 | 3 | 4 | 5 | 6 |
| **10** | I am confident that justice always prevails over injustice. | | | | | 1 | | 2 | 3 | 4 | 5 | 6 |
| **11** | I am convinced that in the long run people will be compensated for injustices. | | | | | 1 | | 2 | 3 | 4 | 5 | 6 |
| **12** | I firmly believe that injustices in all areas of life (e.g.，professional, family, politics) are the exception rather than the rule. | | | | | 1 | | 2 | 3 | 4 | 5 | 6 |
| **13** | I think people try to be fair when making important decisions. | | | | | 1 | | 2 | 3 | 4 | 5 | 6 |

| **Never** | | **Rarely** | **Sometimes** | **Often** | | | **Always** | | | |
| --- | --- | --- | --- | --- | --- | --- | --- | --- | --- | --- |
| **1** | | **2** | **3** | **4** | | | **5** | | | |
|  | **Resilience** | | | | | | | | | |
| **1** | Able to adapt to change | | | | 1 | 2 | | 3 | 4 | 5 |
| **2** | Can deal with whatever comes | | | | 1 | 2 | | 3 | 4 | 5 |
| **3** | Tries to see humorous side of problems | | | | 1 | 2 | | 3 | 4 | 5 |
| **4** | Coping with stress can strengthen me | | | | 1 | 2 | | 3 | 4 | 5 |
| **5** | Tend to bounce back after illness or hardship | | | | 1 | 2 | | 3 | 4 | 5 |
| **6** | Can achieve goals despite obstacles | | | | 1 | 2 | | 3 | 4 | 5 |
| **7** | Can stay focused under pressure | | | | 1 | 2 | | 3 | 4 | 5 |
| **8** | Not easily discouraged by failure | | | | 1 | 2 | | 3 | 4 | 5 |
| **9** | Thinks of self as strong person | | | | 1 | 2 | | 3 | 4 | 5 |
| **10** | Can handle unpleasant feelings | | | | 1 | 2 | | 3 | 4 | 5 |

| **Strongly disagree** | | **Disagree** | **Slightly disagree** | **Slightly agree** | | **Agree** | | | **Strongly agree** | | | |
| --- | --- | --- | --- | --- | --- | --- | --- | --- | --- | --- | --- | --- |
| **1** | | **2** | **3** | **4** | | **5** | | | **6** | | | |
|  | **Gratitude** | | | | | | | | | | | |
| **1** | I have so much in life to be thankful for. | | | | 1 | | 2 | 3 | | 4 | 5 | 6 |
| **2** | If l had to list everything that l felt grateful for, it would be a very long list. | | | | 1 | | 2 | 3 | | 4 | 5 | 6 |
| **3** | When l look at the world, l don't see much to be grateful for. | | | | 1 | | 2 | 3 | | 4 | 5 | 6 |
| **4** | l am grateful to a wide variety of people. | | | | 1 | | 2 | 3 | | 4 | 5 | 6 |
| **5** | As l get older l find myself more able to appreciate the people, events, and situations that have been part of my life history. | | | | 1 | | 2 | 3 | | 4 | 5 | 6 |
| **6** | Long amounts of time can go by before l feel grateful to something or someone. | | | | 1 | | 2 | 3 | | 4 | 5 | 6 |

| **Strongly disagree** | | **Disagree** | **Slightly disagree** | **Neutral** | | **Slightly agree** | | | **Agree** | | | **Strongly agree** | | |
| --- | --- | --- | --- | --- | --- | --- | --- | --- | --- | --- | --- | --- | --- | --- |
| **1** | | **2** | **3** | **4** | | **5** | | | **6** | | | **7** | | |
|  | **Proactive Personality** | | | | | | | | | | | | | |
| 1 | I am constantly on the lookout for new ways to improve my life. | | | | 1 | | 2 | 3 | | 4 | 5 | | 6 | 7 | |
| 2 | Wherever I have been, I have been a powerful force for constructive change. | | | | 1 | | 2 | 3 | | 4 | 5 | | 6 | 7 | |
| 3 | I enjoy facing and overcoming obstacles to my ideas. | | | | 1 | | 2 | 3 | | 4 | 5 | | 6 | 7 | |
| 4 | Nothing is more exciting than seeing my ideas turn into reality. | | | | 1 | | 2 | 3 | | 4 | 5 | | 6 | 7 | |
| 5 | If I see something I don’t like, I fix it. | | | | 1 | | 2 | 3 | | 4 | 5 | | 6 | 7 | |
| 6 | No matter what the odds, if I believe in something I will make it happen. | | | | 1 | | 2 | 3 | | 4 | 5 | | 6 | 7 | |
| 7 | I love being a champion for my ideas, even against others’ opposition. | | | | 1 | | 2 | 3 | | 4 | 5 | | 6 | 7 | |
| 8 | I am always looking for better ways to do things. | | | | 1 | | 2 | 3 | | 4 | 5 | | 6 | 7 | |
| 9 | If I believe in an idea, no obstacle will prevent me from making it happen. | | | | 1 | | 2 | 3 | | 4 | 5 | | 6 | 7 | |
| 10 | I can spot a good opportunity long before others can. | | | | 1 | | 2 | 3 | | 4 | 5 | | 6 | 7 | |
